# Supplementary material for: Exploring the role of sandwich-type polyoxometalates in {K10(PW9O34)2M4(H2O)2}@PCN-222 (M = Mn, Ni, Zn) for electroreduction of CO2to CO
Source: Royal Society of Chemistry journal article supplement (doi:10.1039/d3dt01535a), 2023-01-01
Supplement: d3dt01535a1.pdf [file d3dt01535a1.pdf]

## Supporting Information

### Exploring the role of sandwich-type polyoxometalates in $\{\text{K}_{10}(\text{PW}_9\text{O}_{34})_2\text{M}_4(\text{H}_2\text{O})_2\}@\text{PCN-222}$ (M=Mn, Ni, Zn) for electroreduction of $\text{CO}_2$ to CO

Meng-Ting Peng, Chuang Chen, Yan Zhang, Jia-Yu Xu, Yun-Lei Teng\*, Bao-Xia Dong\*

*School of Chemistry and Chemical Engineering, Yangzhou University, Yangzhou, 225002,*

*Jiangsu, PR China.*

\*Corresponding authors.

*E-mail addresses: [bxdong@yzu.edu.cn](mailto:bxdong@yzu.edu.cn) (B-X. Dong), [ylteng@yzu.edu.cn](mailto:ylteng@yzu.edu.cn) (Y.-L. Teng)*

#### Contents:

- 1. Figure S1.** IR spectra of the composites in comparison to the precursor and each sandwich-type POM, (a)  $\text{P}_2\text{W}_{18}\text{Mn}_4@\text{PCN-222}$ ; (b)  $\text{P}_2\text{W}_{18}\text{Ni}_4@\text{PCN-222}$ ; (c)  $\text{P}_2\text{W}_{18}\text{Zn}_4@\text{PCN-222}$ .
- 2. Figure S2.** UV spectra of the composites in comparison to the precursor and each sandwich-type POM, (a)  $\text{P}_2\text{W}_{18}\text{Mn}_4@\text{PCN-222}$ ; (b)  $\text{P}_2\text{W}_{18}\text{Ni}_4@\text{PCN-222}$ ; (c)  $\text{P}_2\text{W}_{18}\text{Zn}_4@\text{PCN-222}$ , in  $\text{CH}_2\text{Cl}_2$ .
- 3. Figure S3.** The UV spectra and standard curves of  $\text{P}_2\text{W}_{18}\text{Mn}_4@\text{PCN-222}$  (a,b),  $\text{P}_2\text{W}_{18}\text{Ni}_4@\text{PCN-222}$  (c,d) and  $\text{P}_2\text{W}_{18}\text{Zn}_4@\text{PCN-222}$  (e,f), in aqueous solution.
- 4. Table S1.** ICP test for  $\text{P}_2\text{W}_{18}\text{M}_4@\text{PCN-222}$  and  $\text{P}_2\text{W}_{18}\text{M}_4$  precursor
- 5. Table S2.** The specific surface area of PCN-222 and  $\text{P}_2\text{W}_{18}\text{M}_4@\text{PCN-222}$
- 6. Figure S4.** Nitrogen adsorption and desorption curves and pore size distribution of  $\text{P}_2\text{W}_{18}\text{Mn}_4@\text{PCN-222}$  (a–b),  $\text{P}_2\text{W}_{18}\text{Ni}_4@\text{PCN-222}$  (c–d), and  $\text{P}_2\text{W}_{18}\text{Zn}_4@\text{PCN-222}$  (e–f).
- 7. Figure S5.** SEM and elemental mapping images of (a)  $\text{P}_2\text{W}_{18}\text{Mn}_4@\text{PCN-222}$ , (b)  $\text{P}_2\text{W}_{18}\text{Ni}_4@\text{PCN-222}$ , and (c)  $\text{P}_2\text{W}_{18}\text{Zn}_4@\text{PCN-222}$ .
- 8. Figure S6.** TGA curves and TG-Mass for PCN-222 and  $\text{P}_2\text{W}_{18}\text{M}_4@\text{PCN-222}$  composites.
- 9. Table S3.** C,H,N tests for  $\text{P}_2\text{W}_{18}\text{M}_4@\text{PCN-222}$

- 10. Figure S7.** (a) CV curves of  $P_2W_{18}Ni_4@PCN-222$  compares to the MOF and POM precursors; CV (b) and LSV (c) curves of  $P_2W_{18}Ni_4@PCN-222$  in  $CO_2/N_2$  saturated electrolyte; (d) LSV analysis of  $P_2W_{18}Ni_4@PCN-222$  compares to the MOF and POM precursors.
- 11. Figure S8.** (a) CV curves of  $P_2W_{18}Zn_4@PCN-222$  compares to the MOF and POM precursors; CV (b) and LSV (c) curves of  $P_2W_{18}Zn_4@PCN-222$  in  $CO_2/N_2$  saturated electrolyte; (d) LSV analysis of  $P_2W_{18}Zn_4@PCN-222$  compares to the MOF and POM precursors.
- 12. Figure S9.** Chronocurrent curves of (a) PCN-222; (b)  $P_2W_{18}Mn_4@PCN-222$ ; (c)  $P_2W_{18}Ni_4@PCN-222$ ; (d)  $P_2W_{18}Zn_4@PCN-222$  at different potentials.
- 13. Figure S10.** Comparative analysis of  $FE_{H_2}$  in (a)  $P_2W_{18}Mn_4@PCN-222$ , (b)  $P_2W_{18}Ni_4@PCN-222$ , (c)  $P_2W_{18}Zn_4@PCN-222$  vs. PCN-222 at different potentials.
- 14. Table S4.** Product distribution of  $P_2W_{18}M_4@PCN-222/C$  (M=Mn, Ni, Zn) at an optimal potential of  $-0.60$  V vs. RHE
- 15. Figure S11.** Chronocurrent curves and product analysis of  $P_2W_{18}M_4$  (M=Mn, Ni, Zn) from  $-0.55$  to  $-0.65$  V vs. RHE.
- 16. Figure S12.** CV curves of (a) PCN-222; (b)  $P_2W_{18}Mn_4@PCN-222$ ; (c)  $P_2W_{18}Ni_4@PCN-222$ ; (d)  $P_2W_{18}Zn_4@PCN-222$  with scan rate of  $5\sim 40$   $mV s^{-1}$ .
- 17. Figure S13.** Current density of PCN-222 and  $P_2W_{18}M_4@PCN-222$  at different scan rates.
- 18. Table S5.** Electrochemically active surface area of the catalysts
- 19. Figure S14.** Electrochemical impedance spectroscopy of PCN-222 and  $P_2W_{18}M_4@PCN-222$ .
- 20. Table S6.** Resistances of PCN-222 and  $P_2W_{18}M_4@PCN-222$  in the fitted circuit
- 21. Figure S15.** Tafel slopes of PCN-222 and  $P_2W_{18}M_4@PCN-222$ .
- 22. Figure S16.** Illustrations of each  $P_2W_{18}M_4-H_2-TCPP$  and the corresponding ECR intermediates (\*COOH and \*CO) configurations.
- 23. Figure S17.** Free energies of hydrogen evolution process in  $P_2W_{18}M_4-H_2-TCPP$  and free ligand.
- 24. Table S7.** Frontier molecular orbitals of  $P_2W_{18}M_4-H_2-TCPP$  and free ligand
- 25. Table S8.** Frontier molecular orbital energies of  $P_2W_{18}M_4-H_2-TCPP$  and free ligand
- 26. Table S9.** Comparison of  $FE_{CO}$  with other POM-based composites
- 27. Figure S18.** The  $i-t$  curve of  $P_2W_{18}Mn_4@PCN-222$  for 36 h and the product efficiency at  $-1.235$  V vs. Ag/AgCl.
- 28. Figure S19.** The photo images of  $P_2W_{18}Mn_4$  (a,b) and  $P_2W_{18}Mn_4@PCN-222$  (c,d) loaded carbon

cloth electrode before and after the ECR test of 2 h.

**29. Figure S20.** SEM images of  $P_2W_{18}Mn_4@PCN-222$  loaded carbon cloth electrode before and after the ECR test of 2 h (a,b) and 36 h (c,d).

**30. Figure S21.** XPS spectra of  $P_2W_{18}Mn_4@PCN-222$  composite before and after electrolysis.

**31. Figure S22.** XPS spectra of  $P_2W_{18}Mn_4@PCN-222$  composite before and after electrolysis: (a) P 2p; (b) W 4f; (c) Mn 2p; (d) Zr 3d.

**32. Table S10.** ICP results for each composite before and after electrolysis

**33. Figure S23.** Five kinds of possible interactions between  $P_2W_{18}M_4$  and  $H_2-TCPP$ .

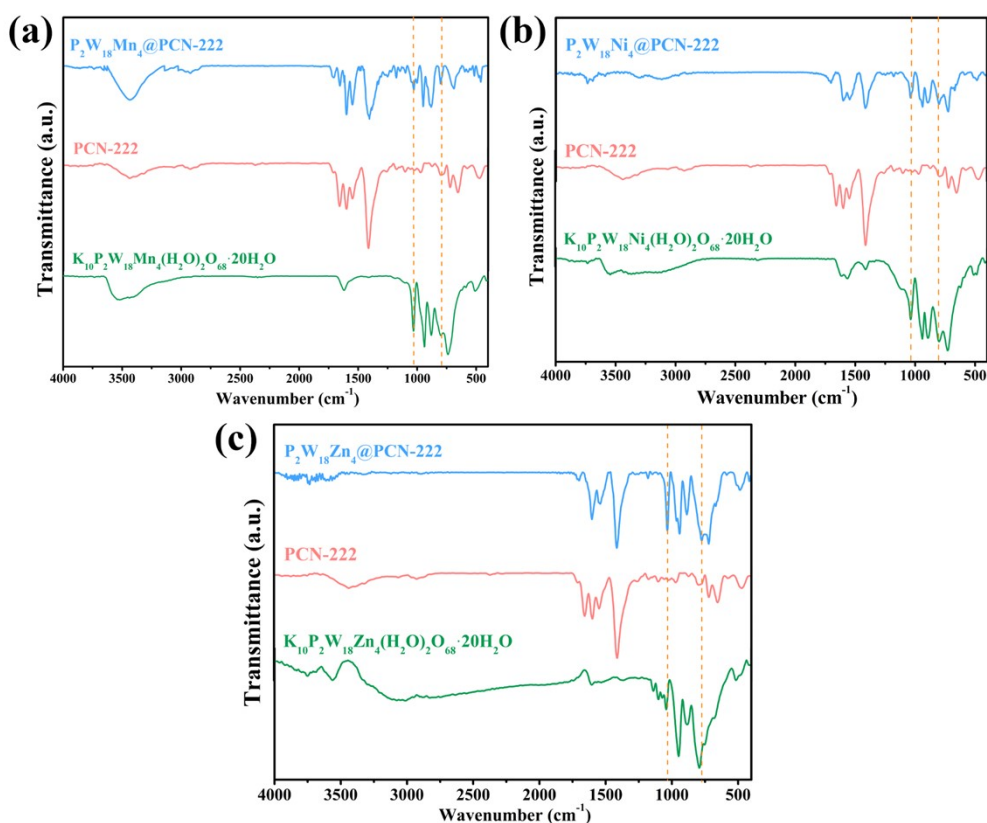

**Figure S1.** IR spectra of the composites in comparison to the precursor and each sandwich-type POM, (a)  $P_2W_{18}Mn_4@PCN-222$ ; (b)  $P_2W_{18}Ni_4@PCN-222$ ; (c)  $P_2W_{18}Zn_4@PCN-222$ .

As for  $P_2W_{18}Mn_4@PCN-222$  (Figure S1a),  $1029\text{ cm}^{-1}$  (P–O),  $948\text{ cm}^{-1}$  (W–O),  $877$  and  $798\text{ cm}^{-1}$  (W–O–W) belong to the characteristic peaks of  $P_2W_{18}Mn_4$ ,  $1402\text{ cm}^{-1}$  (C–C) and  $1598\text{ cm}^{-1}$  (phenyl) belong to the characteristic peaks of PCN-222;

As for  $P_2W_{18}Ni_4@PCN-222$  (Figure S1b),  $1037\text{ cm}^{-1}$  (P–O),  $939\text{ cm}^{-1}$  (W–O),  $893$  and  $725\text{ cm}^{-1}$  (W–O–W) belong to the characteristic peaks of  $P_2W_{18}Ni_4$ ,  $1416\text{ cm}^{-1}$  (C–C) and  $1587\text{ cm}^{-1}$  (phenyl) belong to the characteristic peaks of PCN-222;

As for  $P_2W_{18}Zn_4@PCN-222$  (Figure S1c),  $1033\text{ cm}^{-1}$  (P–O),  $941\text{ cm}^{-1}$  (W–O),  $887$  and  $775\text{ cm}^{-1}$  (W–O–W) belong to the characteristic peaks of  $P_2W_{18}Zn_4$ ,  $1416\text{ cm}^{-1}$  (C–C) and  $1603\text{ cm}^{-1}$  (phenyl) belong to the characteristic peaks of PCN-222.<sup>1-2</sup>

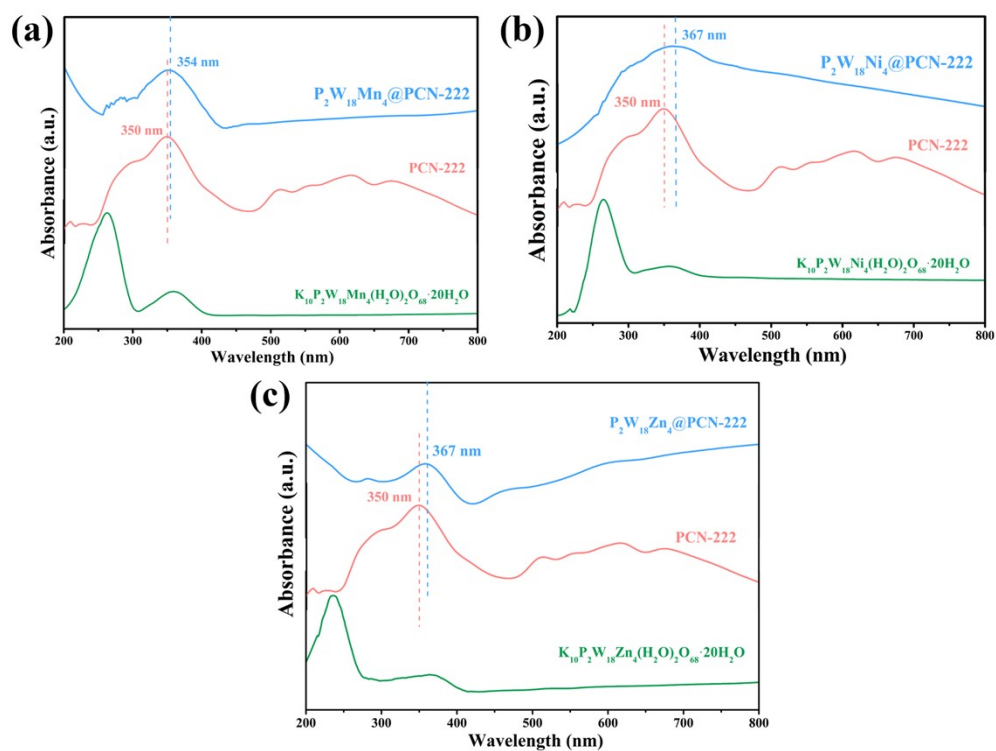

**Figure S2.** UV spectra of the composites in comparison to the precursor and each sandwich-type POM, (a)  $P_2W_{18}Mn_4@PCN-222$ ; (b)  $P_2W_{18}Ni_4@PCN-222$ ; (c)  $P_2W_{18}Zn_4@PCN-222$ , in  $CH_2Cl_2$ .

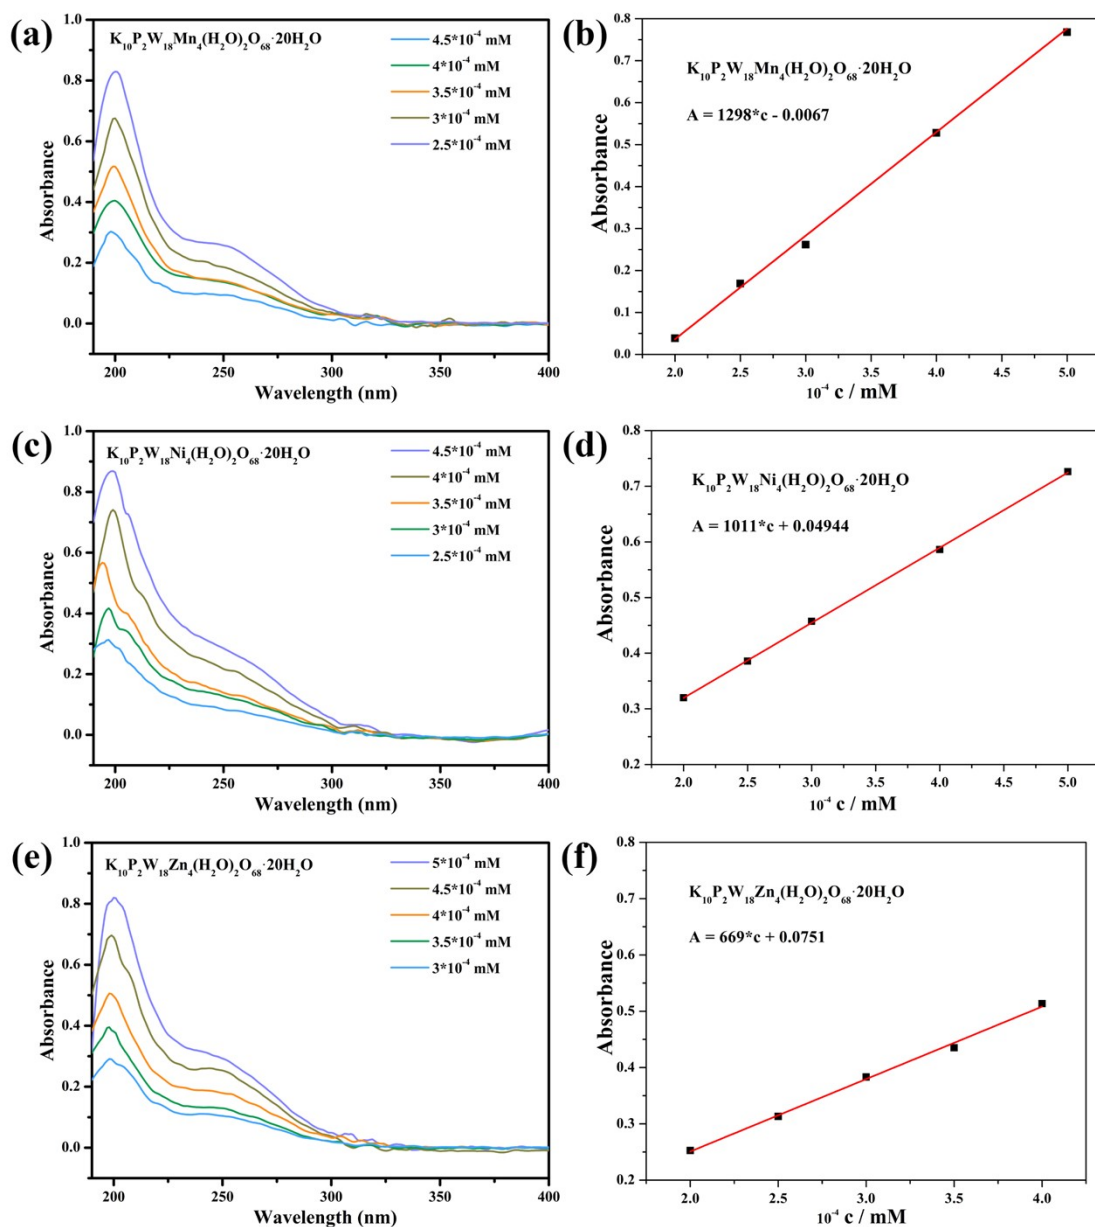

**Figure S3.** The UV spectra and standard curves of  $P_2W_{18}Mn_4@PCN-222$  (a,b),  $P_2W_{18}Ni_4@PCN-222$  (c,d) and  $P_2W_{18}Zn_4@PCN-222$  (e,f), in aqueous solution.

**Table S1.** ICP test for  $P_2W_{18}M_4@PCN-222$  and  $P_2W_{18}M_4$  precursor

|                                           | P     | W     | Mn    | Ni    | Zn    | Zr    |                   | $n_{P_2W_{18}M_4}/mg$ | $P_2W_{18}M_4$ |
|-------------------------------------------|-------|-------|-------|-------|-------|-------|-------------------|-----------------------|----------------|
|                                           | mg/L  |       |       |       |       |       | P/W/M/Zr          | electrocatalyst       | Loading/       |
|                                           |       |       |       |       |       |       |                   | / $\mu mol$           | unit cell      |
| <b><math>P_2W_{18}Mn_4@PCN-222</math></b> | 0.093 | 4.914 | 0.321 |       |       | 3.871 | 1: 8.9: 2.0: 14.1 | 0.0741                | 0.21           |
| <b><math>P_2W_{18}Mn_4</math></b>         | 0.267 | 14.23 | 0.956 |       |       |       | 1: 9.0: 2.0       |                       |                |
| <b><math>P_2W_{18}Ni_4@PCN-222</math></b> | 0.088 | 4.671 |       | 0.328 |       | 3.831 | 1: 9.1: 2.0: 15.0 | 0.0705                | 0.20           |
| <b><math>P_2W_{18}Ni_4</math></b>         | 0.301 | 15.89 |       | 1.066 |       |       | 1: 8.9: 1.9       |                       |                |
| <b><math>P_2W_{18}Zn_4@PCN-222</math></b> | 0.099 | 5.411 |       |       | 0.463 | 2.741 | 1: 9.2: 2.2: 9.4  | 0.0817                | 0.33           |
| <b><math>P_2W_{18}Zn_4</math></b>         | 0.259 | 13.98 |       |       | 1.133 |       | 1: 9.1: 2.1       |                       |                |

**Table S2.** The specific surface area of PCN-222 and  $P_2W_{18}M_4@PCN-222$ 

| Catalysts               | $S_{BET}$ ( $m^2/g$ ) |
|-------------------------|-----------------------|
| PCN-222                 | 1998~2103             |
| $P_2W_{18}Mn_4@PCN-222$ | 825                   |
| $P_2W_{18}Ni_4@PCN-222$ | 761                   |
| $P_2W_{18}Zn_4@PCN-222$ | 811                   |

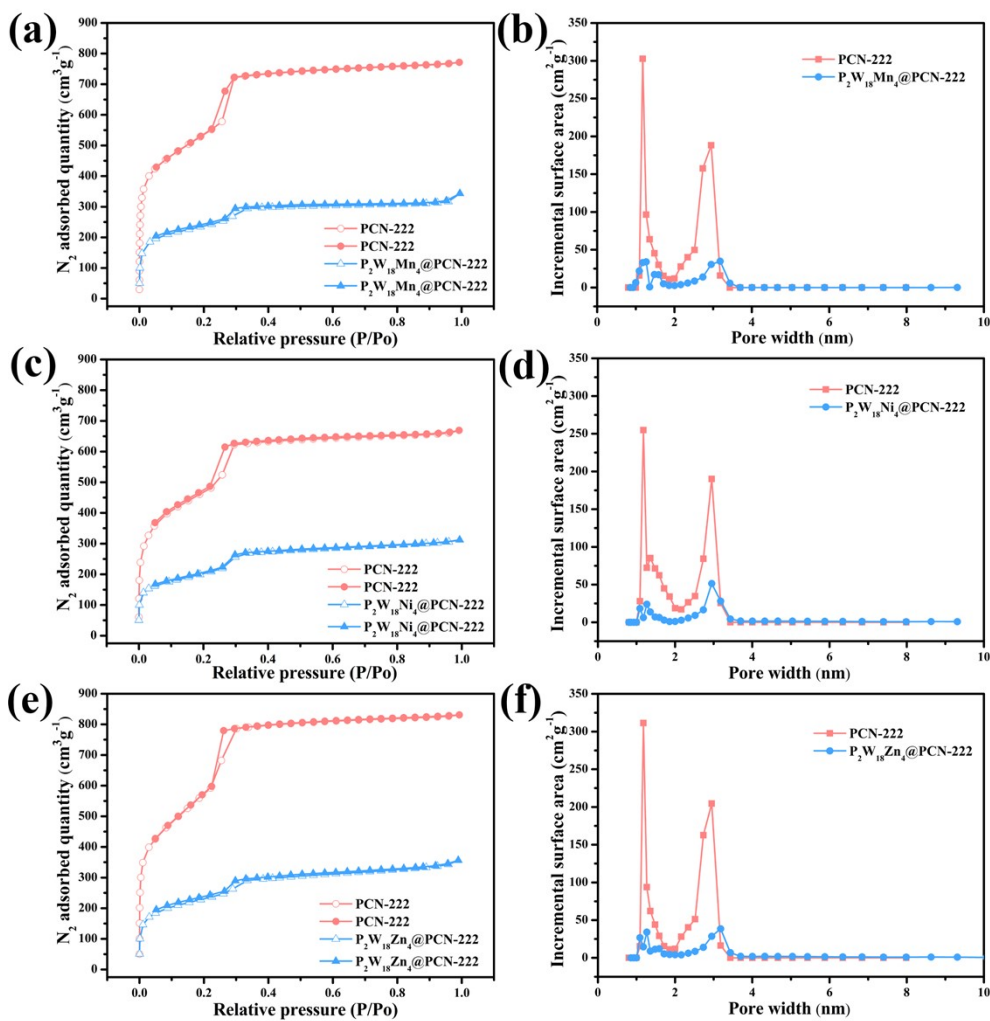

**Figure S4.** Nitrogen adsorption and desorption curves and pore size distribution of  $P_2W_{18}Mn_4@PCN-222$  (a-b),  $P_2W_{18}Ni_4@PCN-222$  (c-d), and  $P_2W_{18}Zn_4@PCN-222$  (e-f).

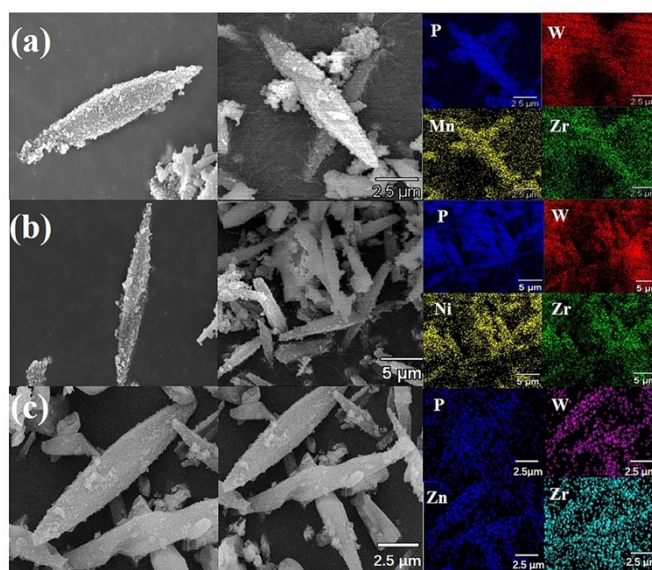

**Figure S5.** SEM and elemental mapping images of (a)  $P_2W_{18}Mn_4@PCN-222$ , (b)



$P_2W_{18}Ni_4@PCN-222$ , and (c)  $P_2W_{18}Zn_4@PCN-222$ .

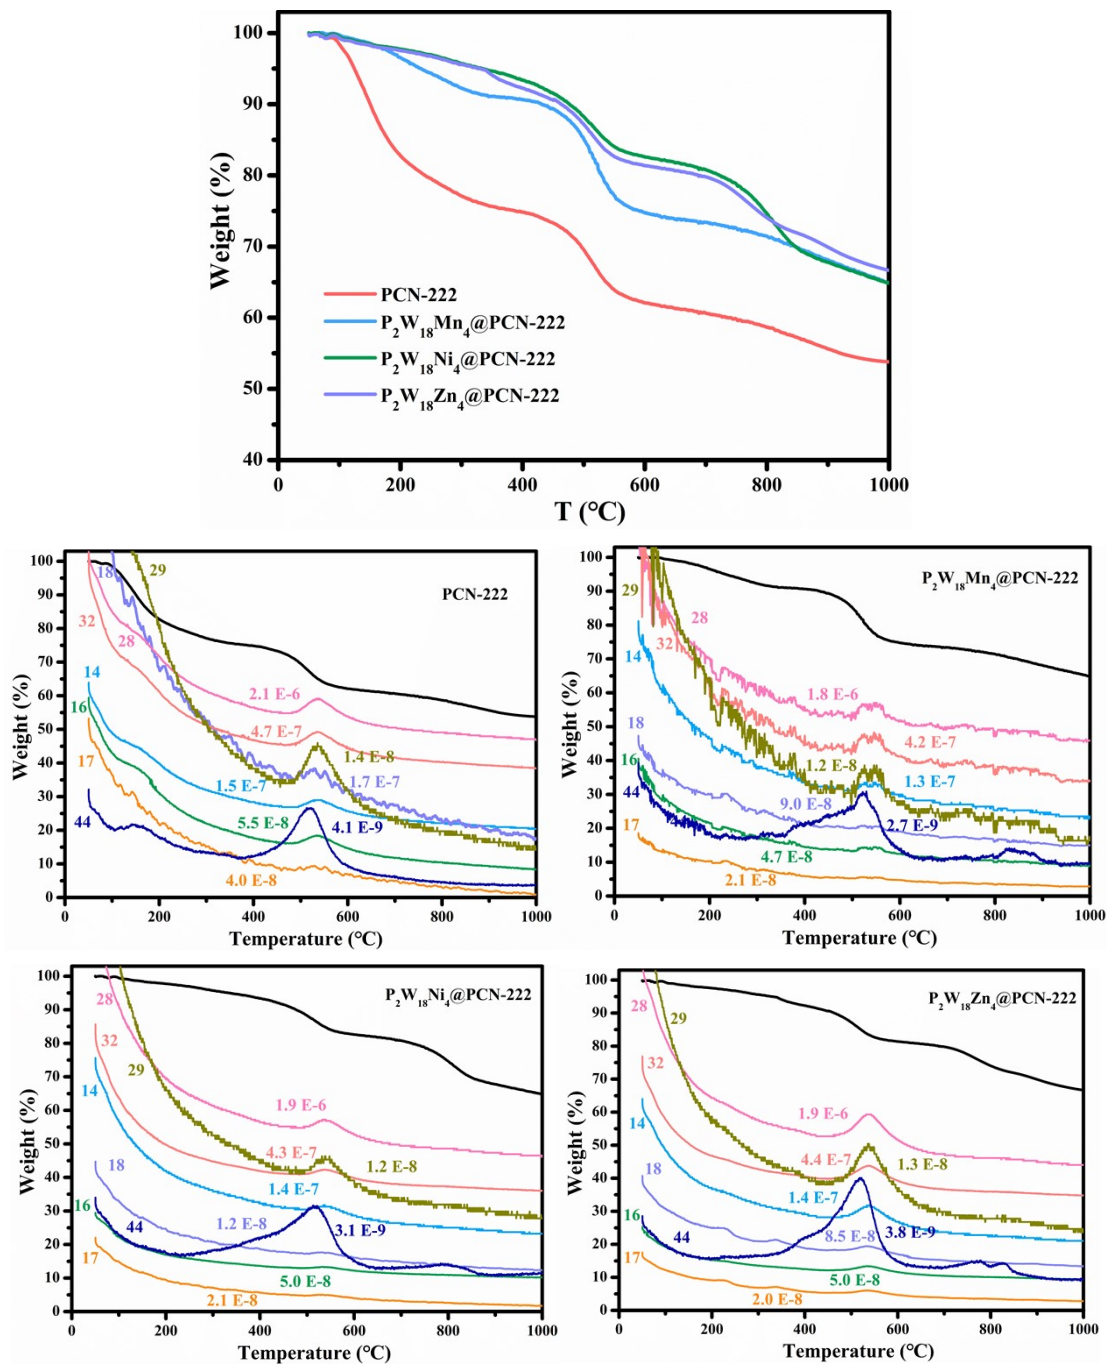

Figure S6. TGA curves and TG-Mass for PCN-222 and  $P_2W_{18}M_4@PCN-222$  composites.

**Table S3.** C,H,N tests for P<sub>2</sub>W<sub>18</sub>M<sub>4</sub>@PCN-222

|                                                         | C wt% | H wt% | N wt% |
|---------------------------------------------------------|-------|-------|-------|
| P <sub>2</sub> W <sub>18</sub> Mn <sub>4</sub> @PCN-222 | 33.46 | 2.14  | 3.30  |
| P <sub>2</sub> W <sub>18</sub> Ni <sub>4</sub> @PCN-222 | 33.94 | 2.06  | 3.31  |
| P <sub>2</sub> W <sub>18</sub> Zn <sub>4</sub> @PCN-222 | 28.21 | 2.34  | 2.73  |
| PCN-222                                                 | 46.68 | 2.96  | 4.52  |

We tentatively considered the following formulae:

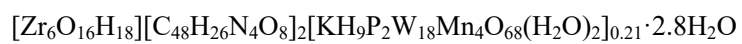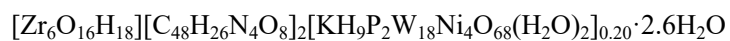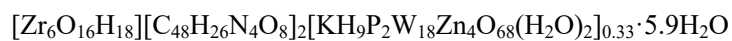

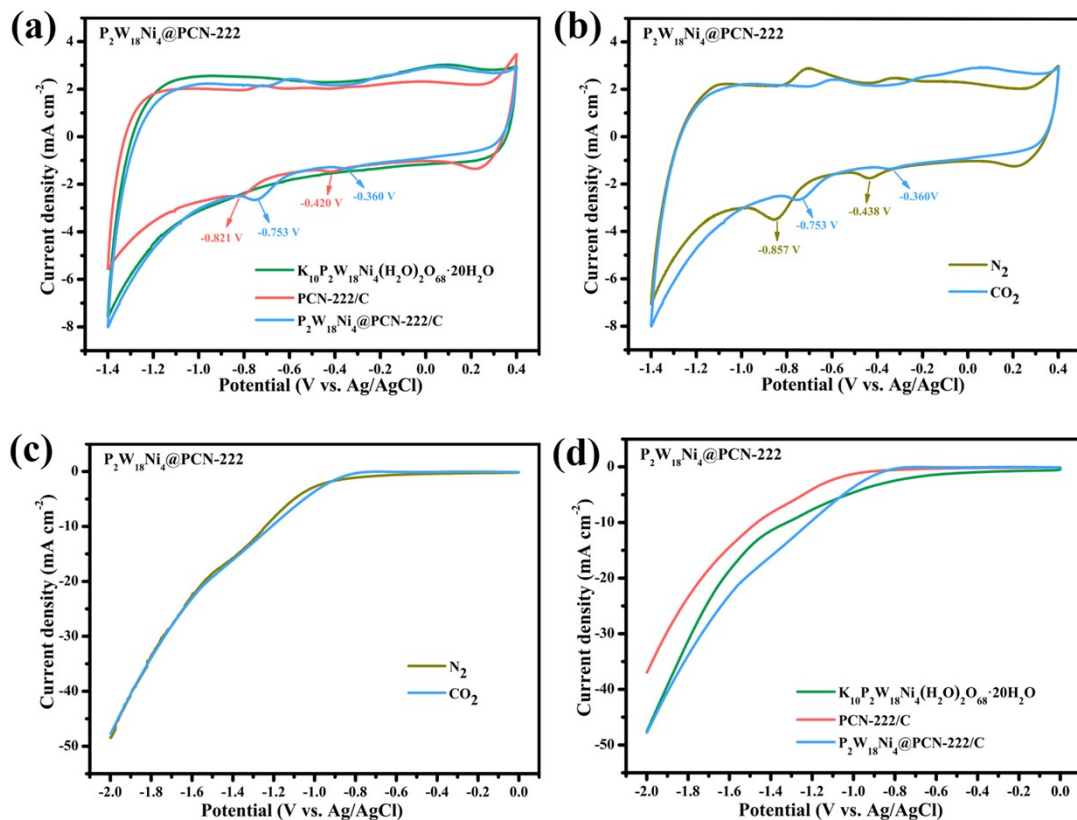

**Figure S7.** (a) CV curves of  $P_2W_{18}Ni_4@PCN-222$  compares to the MOF and POM precursors in  $CO_2$ -saturated  $0.5\text{ M KHCO}_3$  solution; CV (b) and LSV (c) curves of  $P_2W_{18}Ni_4@PCN-222$  in  $CO_2$ -/ $N_2$  saturated electrolyte; (d) LSV analysis of  $P_2W_{18}Ni_4@PCN-222$  compares to the MOF and POM precursors in  $CO_2$ -saturated electrolyte; sweep speed,  $50\text{ mV/s}$ .

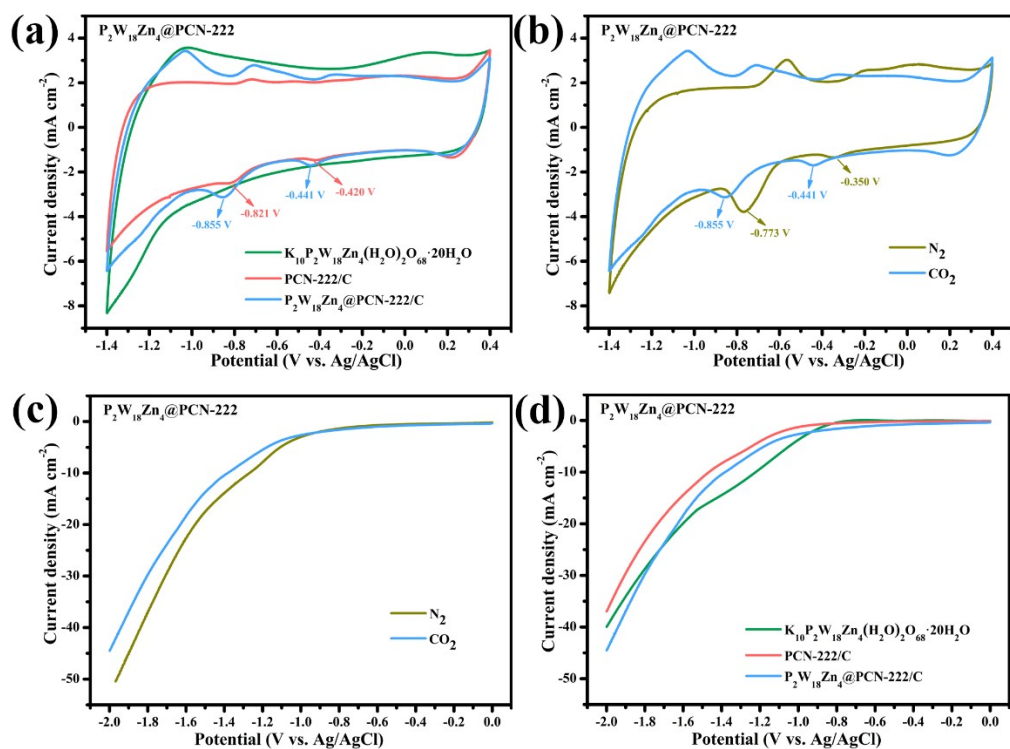

**Figure S8.** (a) CV curves of  $P_2W_{18}Zn_4@PCN-222$  compares to the MOF and POM precursors in  $CO_2$ -saturated 0.5 M  $KHCO_3$  solution; CV (b) and LSV (c) curves of  $P_2W_{18}Zn_4@PCN-222$  in  $CO_2$ -/ $N_2$  saturated electrolyte; (d) LSV analysis of  $P_2W_{18}Zn_4@PCN-222$  compares to the MOF and POM precursors in  $CO_2$ -saturated electrolyte; sweep speed, 50 mV/s.

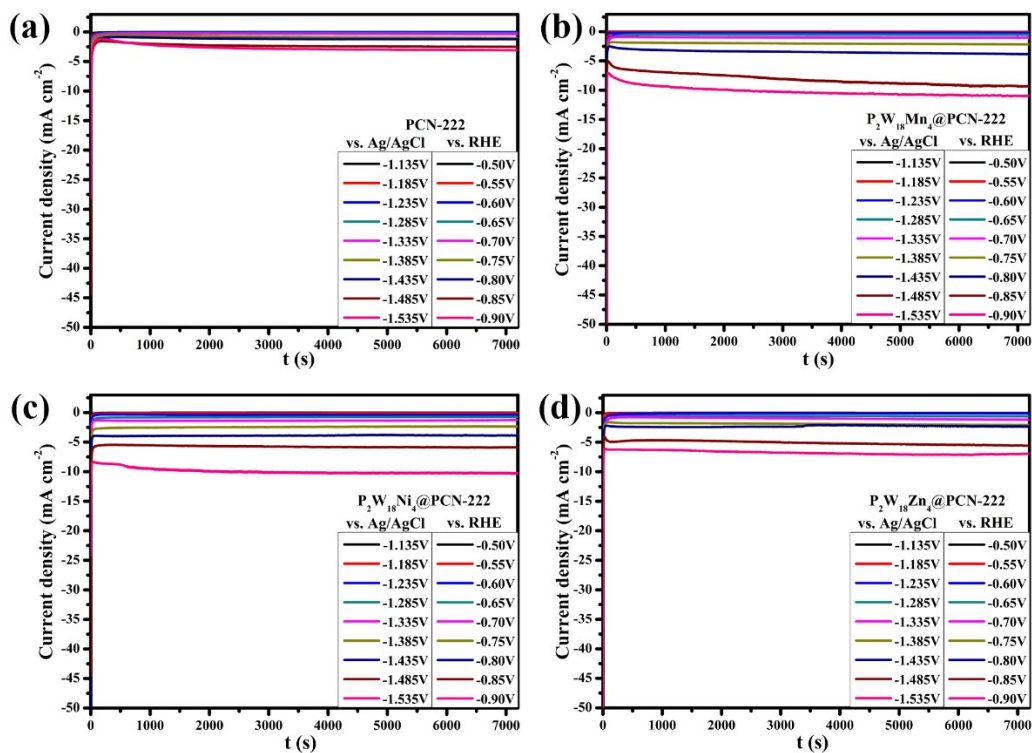

**Figure S9.** Chronocurrent curves of (a) PCN-222; (b)  $P_2W_{18}Mn_4@PCN-222$ ; (c)  $P_2W_{18}Ni_4@PCN-222$ ; (d)  $P_2W_{18}Zn_4@PCN-222$  at different potentials.

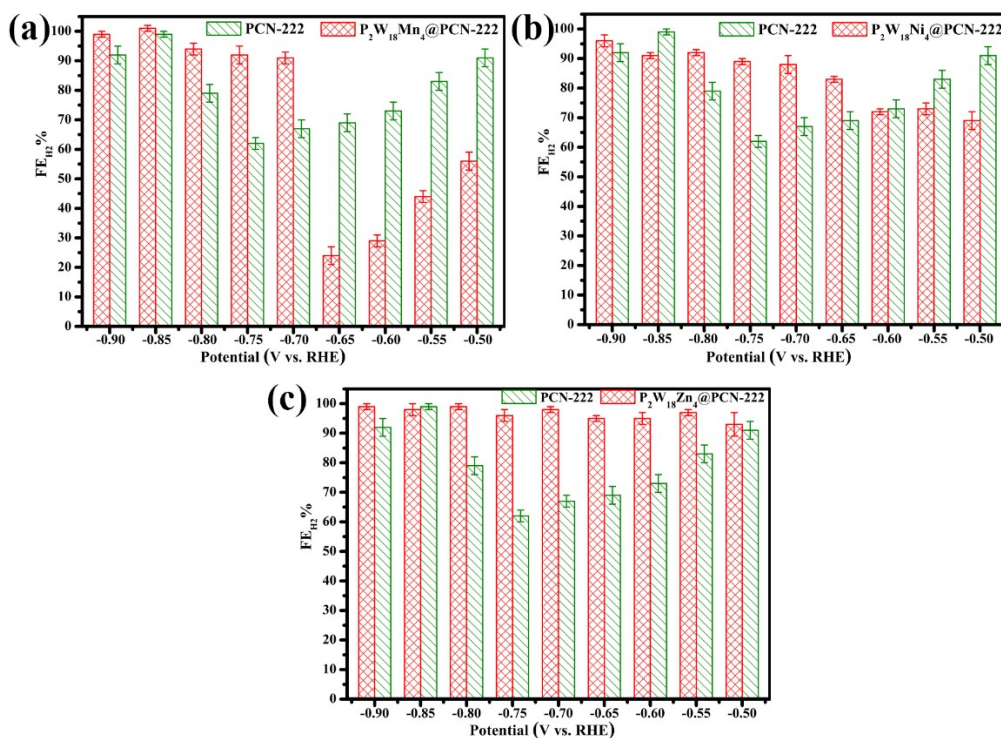

**Figure S10.** Comparative analysis of  $FE_{H_2}$  in (a)  $P_2W_{18}Mn_4@PCN-222$ , (b)  $P_2W_{18}Ni_4@PCN-222$ , (c)  $P_2W_{18}Zn_4@PCN-222$  vs. PCN-222 at different potentials.

**Table S4.** Product distribution of  $P_2W_{18}M_4@PCN-222$  ( $M=Mn, Ni, Zn$ ) at an optimal potential of  $-0.60$  V vs. RHE

|                 | PCN-222 | $P_2W_{18}Mn_4@$<br>PCN-222 | $P_2W_{18}Ni_4@$<br>PCN-222 | $P_2W_{18}Zn_4@$<br>PCN-222 |
|-----------------|---------|-----------------------------|-----------------------------|-----------------------------|
| vs. Ag/AgCl (V) |         | -1.235                      |                             |                             |
| vs. RHE (V)     |         | -0.60                       |                             |                             |
| $FE_{H_2}$ (%)  | 73.6    | 29.2                        | 72.2                        | 95.2                        |
| $FE_{CO}$ (%)   | 18.1    | 72.6                        | 26.9                        | 3.5                         |

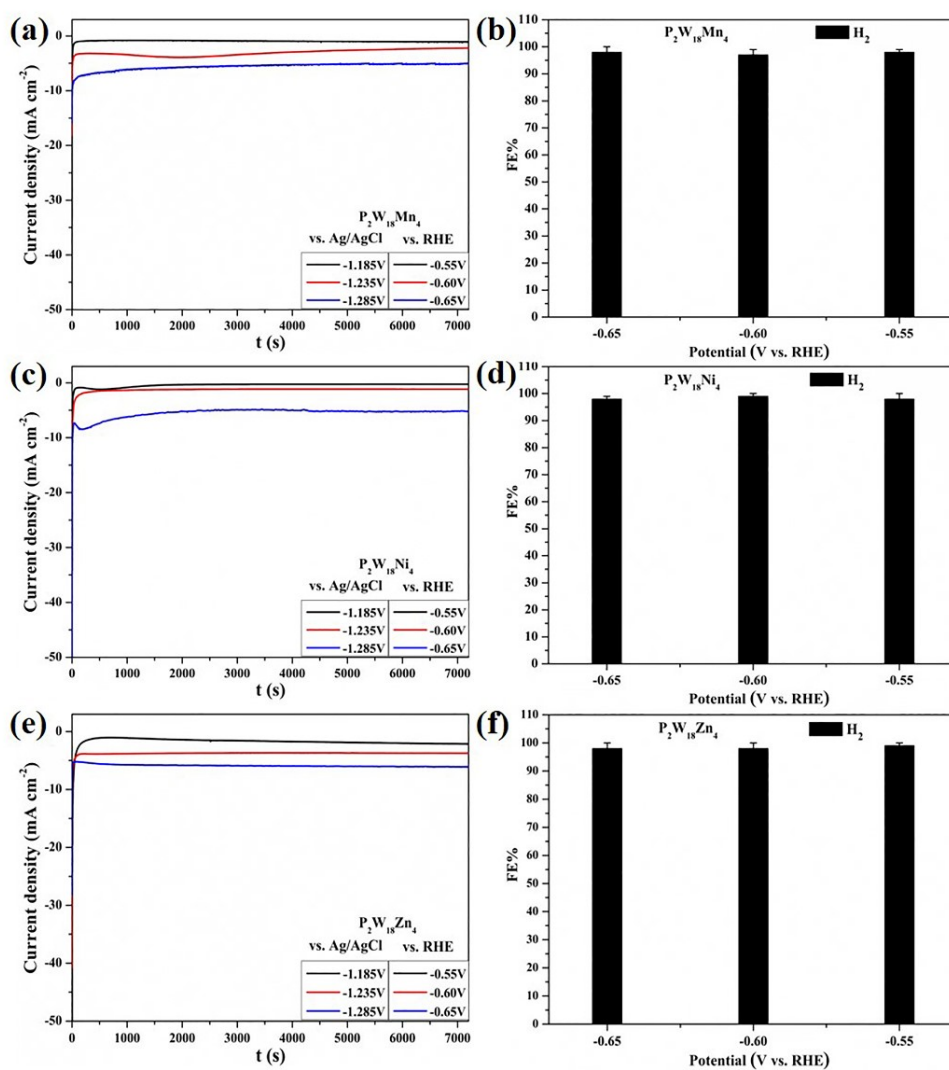

**Figure S11.** Chronocurrent curves and product analysis of  $P_2W_{18}M_4$  ( $M=Mn, Ni, Zn$ ) from  $-0.55$  to  $-0.65$  V vs. RHE.

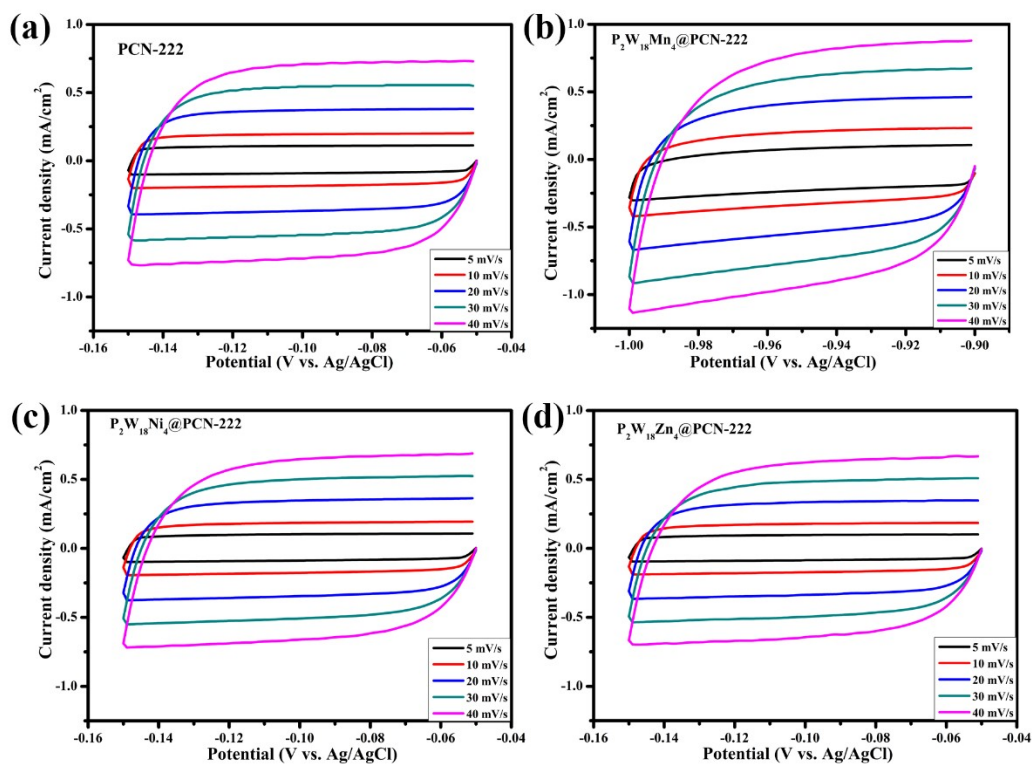

**Figure S12.** CV curves of (a) PCN-222; (b) P<sub>2</sub>W<sub>18</sub>Mn<sub>4</sub>@PCN-222; (c) P<sub>2</sub>W<sub>18</sub>Ni<sub>4</sub>@PCN-222; (d) P<sub>2</sub>W<sub>18</sub>Zn<sub>4</sub>@PCN-222 with scan rate of 5~40 mV s<sup>-1</sup>.

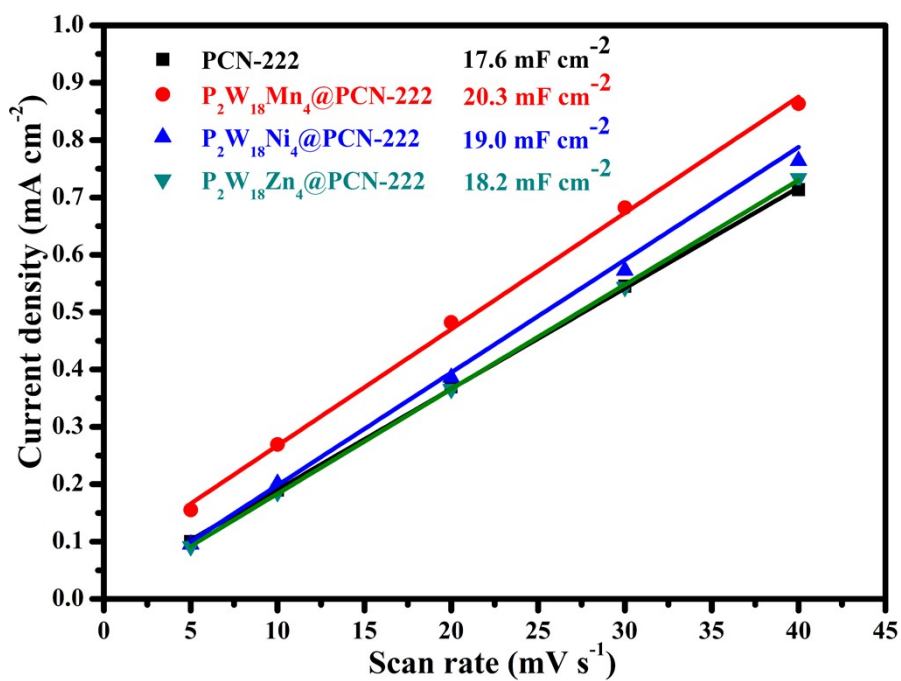

**Figure S13.** Current density of PCN-222 and P<sub>2</sub>W<sub>18</sub>M<sub>4</sub>@PCN-222 at different scan rates.

**Table S5.** Electrochemically active surface area of the catalysts

| Catalysts                                               | $C_{dl}$ (mF cm <sup>-2</sup> ) | ECSA (cm <sup>2</sup> ) |
|---------------------------------------------------------|---------------------------------|-------------------------|
| PCN-222                                                 | 17.6                            | 878.0                   |
| P <sub>2</sub> W <sub>18</sub> Mn <sub>4</sub> @PCN-222 | 20.3                            | 1013.5                  |
| P <sub>2</sub> W <sub>18</sub> Ni <sub>4</sub> @PCN-222 | 19.0                            | 948.0                   |
| P <sub>2</sub> W <sub>18</sub> Zn <sub>4</sub> @PCN-222 | 18.2                            | 911.5                   |

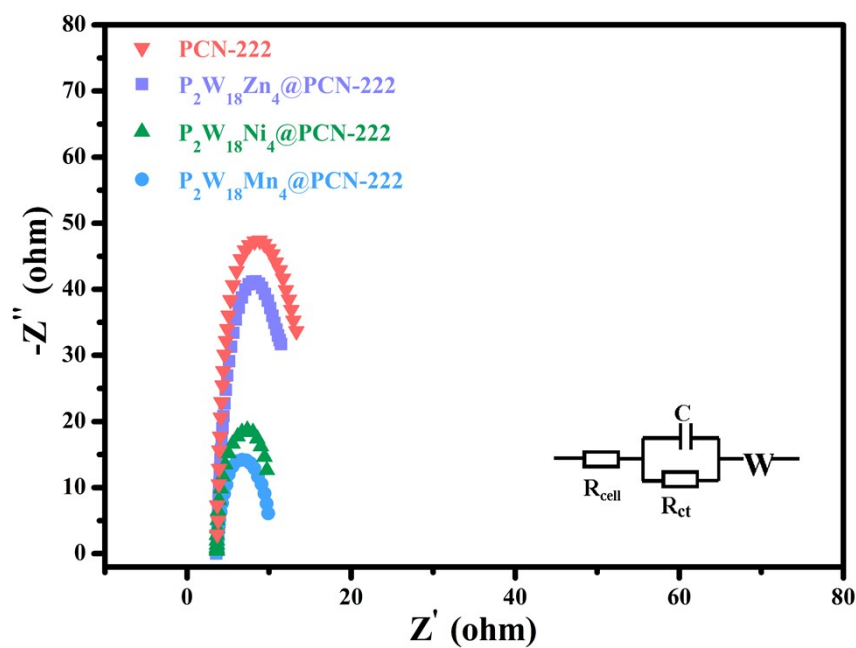**Figure S14.** Electrochemical impedance spectroscopy of PCN-222 and P<sub>2</sub>W<sub>18</sub>M<sub>4</sub>@PCN-222.**Table S6.** Resistances of PCN-222 and P<sub>2</sub>W<sub>18</sub>M<sub>4</sub>@PCN-222 in the fitted circuit

| Catalysts                                               | $R_{cell}$ ( $\Omega$ ) | $R_{ct}$ ( $\Omega$ ) |
|---------------------------------------------------------|-------------------------|-----------------------|
| PCN-222                                                 | 6.7                     | 78.4                  |
| P <sub>2</sub> W <sub>18</sub> Mn <sub>4</sub> @PCN-222 | 3.5                     | 12.1                  |
| P <sub>2</sub> W <sub>18</sub> Ni <sub>4</sub> @PCN-222 | 3.8                     | 18.2                  |
| P <sub>2</sub> W <sub>18</sub> Zn <sub>4</sub> @PCN-222 | 5.3                     | 72.3                  |



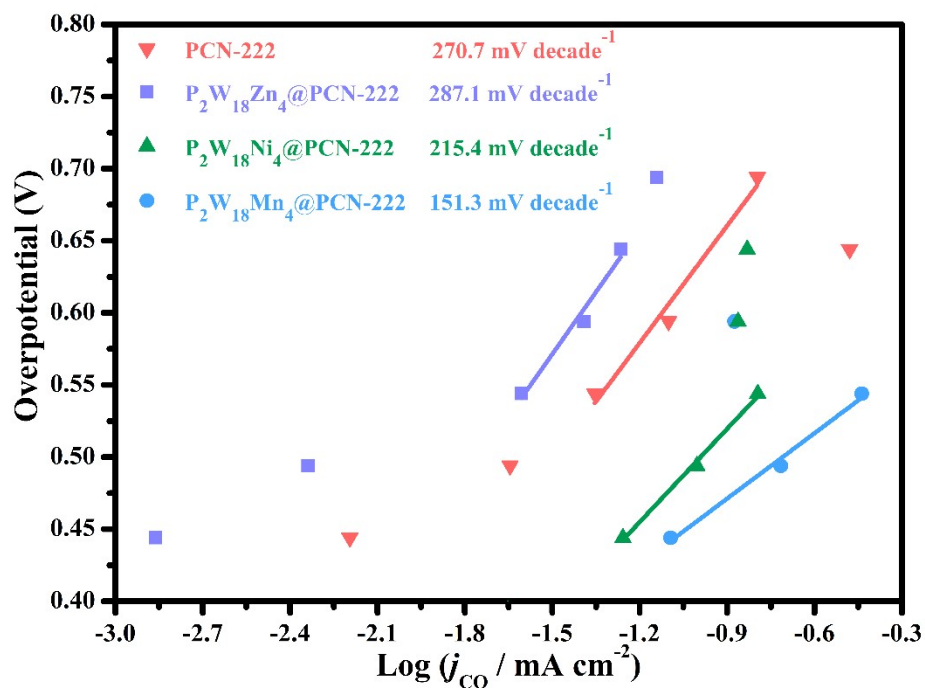

Figure S15. Tafel slopes of PCN-222 and P<sub>2</sub>W<sub>18</sub>M<sub>4</sub>@PCN-222.

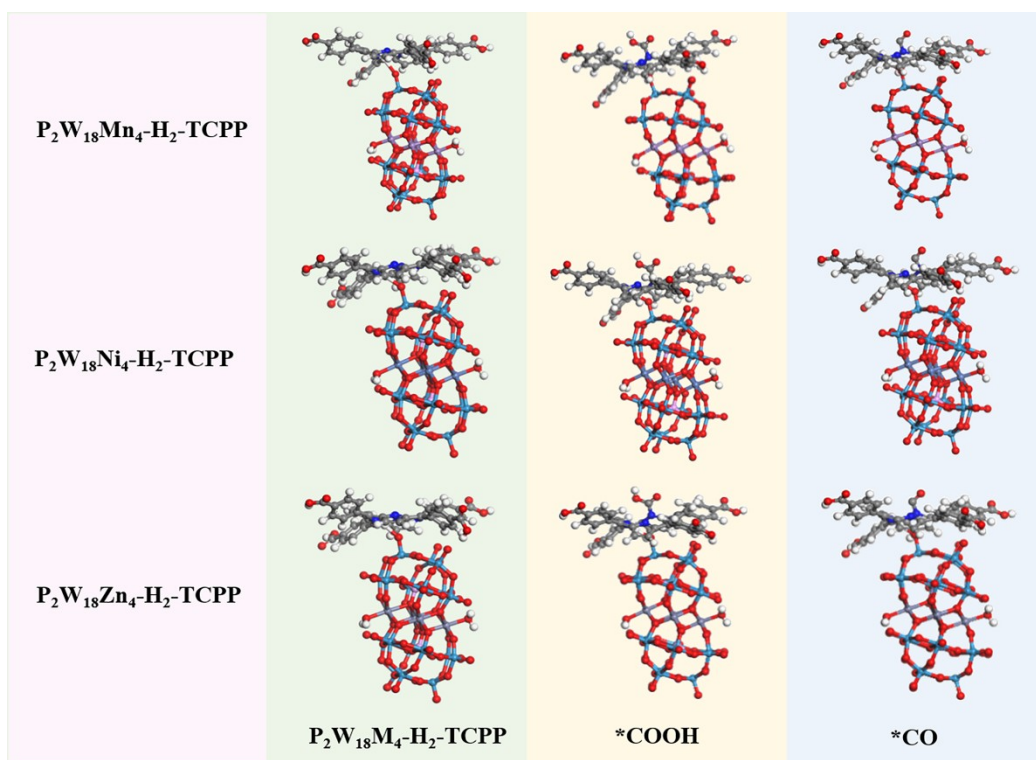

Figure S16. Illustrations of each P<sub>2</sub>W<sub>18</sub>M<sub>4</sub>-H<sub>2</sub>-TCPP and the corresponding ECR intermediates (\*COOH and \*CO) configurations.

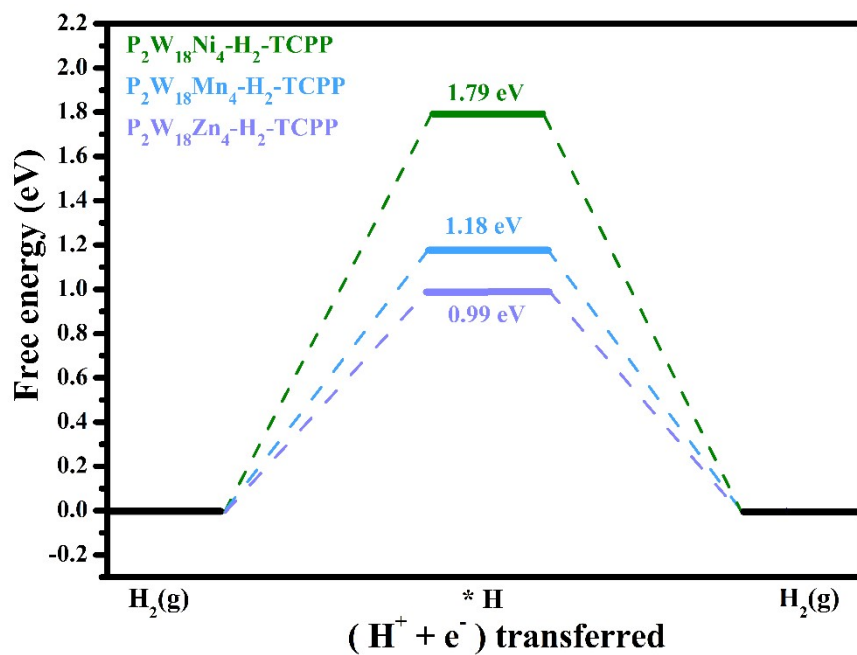

**Figure S17.** Free energies of hydrogen evolution process in  $\text{P}_2\text{W}_{18}\text{M}_4\text{-H}_2\text{-TCPP}$  and free ligand.

**Table S7.** Frontier molecular orbitals of  $\text{P}_2\text{W}_{18}\text{M}_4\text{-H}_2\text{-TCPP}$  and free ligand

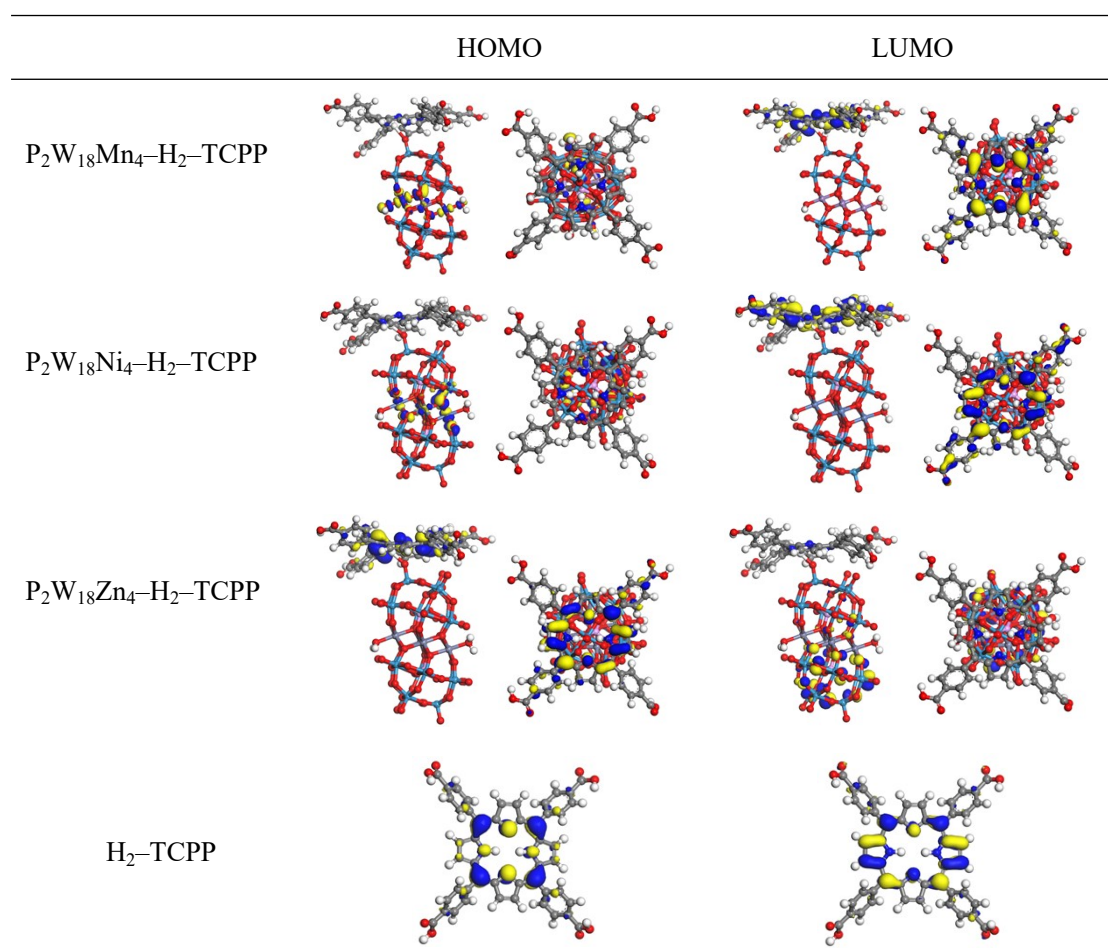

**Table S8.** Frontier molecular orbital energies of P<sub>2</sub>W<sub>18</sub>M<sub>4</sub>-H<sub>2</sub>-TCPP and free ligand

|                                                                          | E <sub>HOMO</sub><br>(eV) | E <sub>LUMO</sub><br>(eV) | ΔE <sub>L-H</sub><br>(eV) | E <sub>onset-red</sub> (V vs<br>Ag/AgCl) <sup>a</sup> | E <sub>LUMO</sub><br>(eV) <sup>b</sup> |
|--------------------------------------------------------------------------|---------------------------|---------------------------|---------------------------|-------------------------------------------------------|----------------------------------------|
| P <sub>2</sub> W <sub>18</sub> Mn <sub>4</sub> -H <sub>2</sub> -<br>TCPP | -0.172                    | -0.148                    | 0.024                     | -0.273                                                | -4.447                                 |
| P <sub>2</sub> W <sub>18</sub> Ni <sub>4</sub> -H <sub>2</sub> -<br>TCPP | -0.163                    | -0.131                    | 0.032                     | -0.284                                                | -4.436                                 |
| P <sub>2</sub> W <sub>18</sub> Zn <sub>4</sub> -H <sub>2</sub> -<br>TCPP | -0.167                    | -0.119                    | 0.046                     | -0.368                                                | -4.352                                 |
| H <sub>2</sub> -TCPP                                                     | -0.191                    | -0.129                    | 0.0623                    | -0.352                                                | -4.368                                 |

<sup>a</sup> Onset reduction potential measured by cyclic voltammetry.

<sup>b</sup>  $E_{LUMO} = -(E_{onset(red)} + 4.72)$  eV

The DFT calculation gave the LUMO level trend of P<sub>2</sub>W<sub>18</sub>Mn<sub>4</sub>-H<sub>2</sub>-TCPP < P<sub>2</sub>W<sub>18</sub>Ni<sub>4</sub>-H<sub>2</sub>-TCPP < H<sub>2</sub>-TCPP < P<sub>2</sub>W<sub>18</sub>Zn<sub>4</sub>-H<sub>2</sub>-TCPP. A lower LUMO level means that the composite is more electron-hungry, and therefore, it will be reduced more easily. Hence, we can conclude that their formal reduction potential would follow the trends of P<sub>2</sub>W<sub>18</sub>Zn<sub>4</sub>-H<sub>2</sub>-TCPP < H<sub>2</sub>-TCPP < P<sub>2</sub>W<sub>18</sub>Ni<sub>4</sub>-H<sub>2</sub>-TCPP < P<sub>2</sub>W<sub>18</sub>Mn<sub>4</sub>-H<sub>2</sub>-TCPP (less negative). The CV measurement brings out consistent results of -0.441 V (P<sub>2</sub>W<sub>18</sub>Zn<sub>4</sub>-H<sub>2</sub>-TCPP), -0.420 V (H<sub>2</sub>-TCPP), -0.360 V (P<sub>2</sub>W<sub>18</sub>Ni<sub>4</sub>-H<sub>2</sub>-TCPP), and -0.352 V (P<sub>2</sub>W<sub>18</sub>Mn<sub>4</sub>-H<sub>2</sub>-TCPP). Moreover, from the onset reduction potentials in the cyclic voltammogram, the LUMO levels can be estimated according to the following equations:  $E_{LUMO} = -(E_{onset(red)} + 4.72)$  eV.<sup>3,4</sup> It presents the same trends of P<sub>2</sub>W<sub>18</sub>Mn<sub>4</sub>-H<sub>2</sub>-TCPP < P<sub>2</sub>W<sub>18</sub>Ni<sub>4</sub>-H<sub>2</sub>-TCPP < H<sub>2</sub>-TCPP < P<sub>2</sub>W<sub>18</sub>Zn<sub>4</sub>-H<sub>2</sub>-TCPP with those of the DFT results.

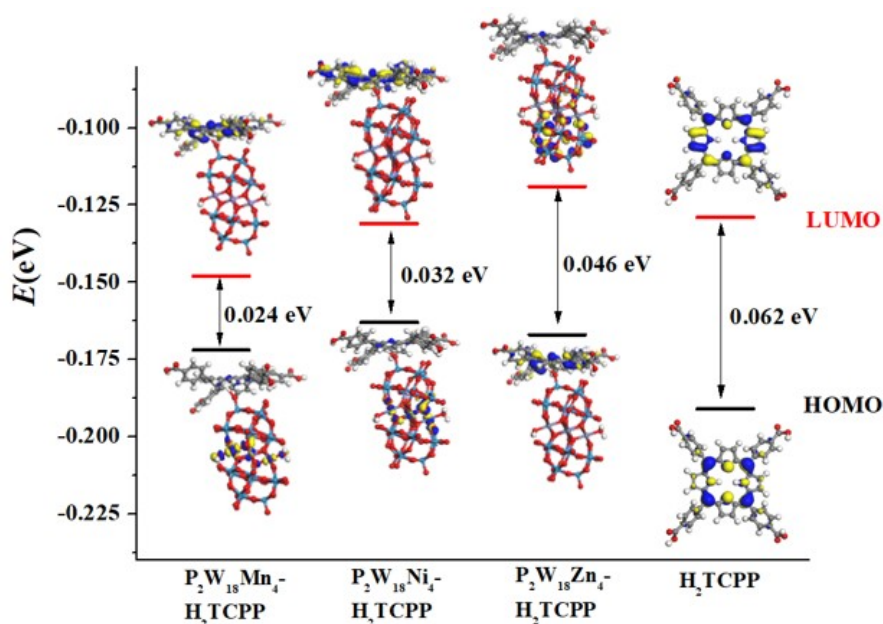



**Table S9.** Comparison of ECR performance with some electron-rich encapsulated composites

| Catalysts                                       | Electrolyte        | Potential<br>[ $\eta$ ] (V) | Stability | Product                          | FE (%) | Ref.      |
|-------------------------------------------------|--------------------|-----------------------------|-----------|----------------------------------|--------|-----------|
| $P_2W_{18}Mn_4@PCN-222$                         |                    | -0.60 V vs. RHE<br>[0.494]  | 36 h      |                                  | 72     |           |
| $P_2W_{18}Ni_4@PCN-222$                         | 0.5 M $KHCO_3$     | -0.60 V vs. RHE<br>[0.494]  |           | CO                               | 26     | This work |
| $P_2W_{18}Zn_4@PCN-222$                         |                    | -0.70 V vs. RHE<br>[0.594]  |           |                                  | 5      |           |
| $[Mn^{III}TRP]^{5+}/[SiW_{12}O_{40}]^{4-}$      |                    |                             |           | HCOOH                            |        |           |
| $[Ni^{II}TRP]^{4+}/[SiW_{12}O_{40}]^{4-}$       | 0.1 M $NaClO_4$    | -0.8 V vs<br>Ag/AgCl        |           | CO                               |        | 6         |
| $[Zn^{II}TRP]^{4+}/[SiW_{12}O_{40}]^{4-}$       |                    |                             |           | CH <sub>3</sub> OH               |        |           |
| $AgNC@BSA-SiW_{12}$                             | 0.1 M $Bu_4NPF_6$  | -0.69 V vs RHE              | 5 h       | CO                               | 76     | 7         |
| Ag- $PMo_{12}$                                  | 0.1 M $Bu_4NPF_6$  | -1.90 V vs $Fc^{0/+}$       | 3 h       | CO                               | 90     | 8         |
| Co-PMOF                                         |                    | -0.80 V vs RHE              | 36 h      |                                  | 99     |           |
| Fe-PMOF                                         | 0.5 M $KHCO_3$     | -0.70 V vs RHE              |           | CO                               | 29     | 9         |
| Ni-PMOF                                         |                    | -0.80 V vs RHE              |           |                                  | 19     |           |
| Zn-PMOF                                         |                    | -0.90 V vs RHE              |           |                                  | 1      |           |
| $[H_2PW_{11}O_{39}\{Rh^{III}Cp^*(OH_2)\}]^{3-}$ | TBABF <sub>4</sub> | -1.60 V vs NHE              | 5 h       | HCOO <sup>-</sup>                | 5      | 10        |
| SiW <sub>12</sub> -MnL                          |                    | -0.72 V vs. RHE             | 12 h      |                                  | 95     |           |
| PW <sub>12</sub> -MnL                           | 0.5 M $KHCO_3$     | -0.72 V vs. RHE             |           | CO                               | 80     | 11        |
| PMo <sub>12</sub> -MnL                          |                    | -0.64 V vs. RHE             |           |                                  | 65     |           |
| Mo8@Cu/TNA                                      | NaHCO <sub>3</sub> | -1.13 V vs RHE              |           | CH <sub>3</sub> COO <sup>-</sup> | 49     | 12        |
| Zn-CoTAPc/PMo <sub>12</sub>                     | 0.5 M $KHCO_3$     | -0.70 V vs RHE              | 12 h      | CO                               | 96     | 13        |
| H-POM@PCN-222-Co                                |                    | -0.80 V vs RHE              | 10 h      |                                  | 96     |           |
| H-POM@PCN-222-Fe                                | 0.5 M $KHCO_3$     | -0.80 V vs RHE              |           | CO                               | 42     | 14        |
| H-POM@PCN-222-Mn                                |                    | -0.80 V vs RHE              |           |                                  | 31     |           |
| H-POM@PCN-222-Ni                                |                    | -0.90 V vs RHE              |           |                                  | 41     |           |

|                               |                         |                            |      |    |    |    |
|-------------------------------|-------------------------|----------------------------|------|----|----|----|
| PCN-222/CNT                   |                         | -0.65 V vs. RHE<br>[0.544] |      |    | 81 |    |
| PCN-222(Mn)/CNT               |                         | -0.60 V vs. RHE<br>[0.494] |      |    | 88 |    |
| PCN-222(Co)/CNT               | 0.5 M KHCO <sub>3</sub> | -0.65 V vs. RHE<br>[0.544] |      | CO | 89 | 5  |
| PCN-222(Ni)/CNT               |                         | -0.80 V vs. RHE<br>[0.694] |      |    | 52 |    |
| PCN-222(Zn)/CNT               |                         | -0.70 V vs. RHE<br>[0.594] |      |    | 92 |    |
| CoCp <sub>2</sub> @MOF-545    |                         | -0.70 V vs RHE             |      |    | 20 |    |
| CoCp <sub>2</sub> @MOF-545-Co | 0.5 M KHCO <sub>3</sub> | -0.90 V vs RHE             | 8 h  |    | 97 | 15 |
| FeCp <sub>2</sub> @MOF-545-Co |                         | -0.80 V vs RHE             |      | CO | 94 |    |
| NiCp <sub>2</sub> @MOF-545-Co |                         | -0.80 V vs RHE             |      |    | 82 |    |
| TTF-Por(Co)-COF               | 0.5 M KHCO <sub>3</sub> | -0.70 V vs RHE             | 10 h | CO | 95 | 16 |
| TCPP(Co)/Zr-BTB<br>-PSABA     | 0.5 M KHCO <sub>3</sub> | -0.77 V vs RHE             | 18 h | CO | 85 | 17 |
| ZrPP-1-Co@r-GO                |                         | -0.60 V vs. RHE            | 10 h |    | 82 |    |
| ZrPP-1-Ni@r-GO                | 0.5 M KHCO <sub>3</sub> | -0.60 V vs. RHE            |      |    | 78 | 18 |
| ZrPP-1-Zn@r-GO                |                         | -0.60 V vs. RHE            |      |    | 16 |    |
| NiPor-CTF                     | 0.5 M KHCO <sub>3</sub> | -0.90 V vs. RHE            | 20 h | CO | 97 | 19 |
| PPy@MOF-545-Co                | 0.1 M KHCO <sub>3</sub> | -0.80 V vs. RHE            | 10 h | CO | 98 | 20 |

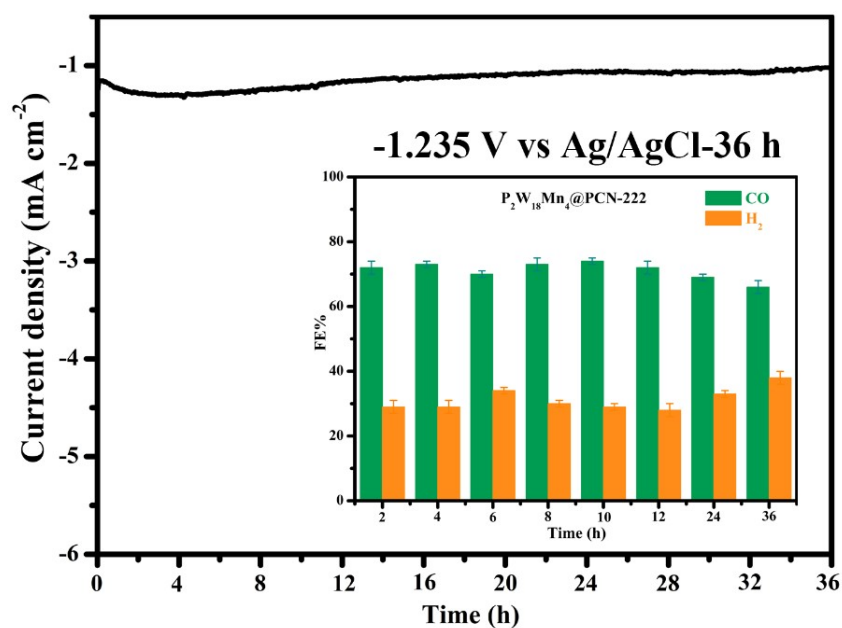

**Figure S18.** The *i*-*t* curve of  $P_2W_{18}Mn_4@PCN-222$  for 36 h and the product efficiency at  $-1.235$  V vs. Ag/AgCl.

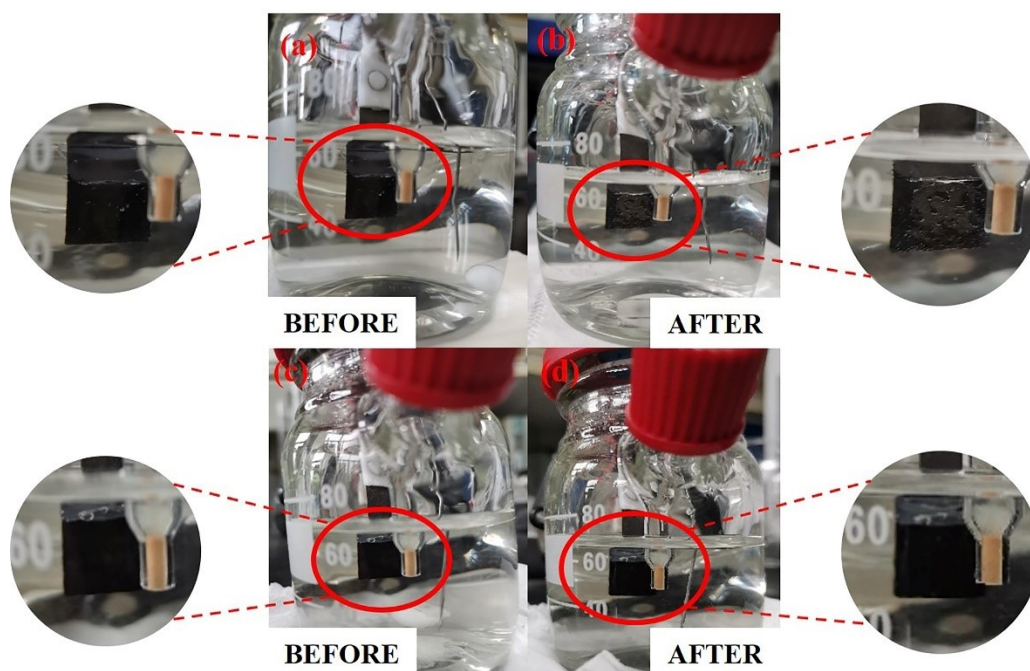

**Figure S19.** The photo images of  $P_2W_{18}Mn_4$  (a,b) and  $P_2W_{18}Mn_4@PCN-222$  (c,d) loaded carbon cloth electrode before and after the ECR test of 2 h.

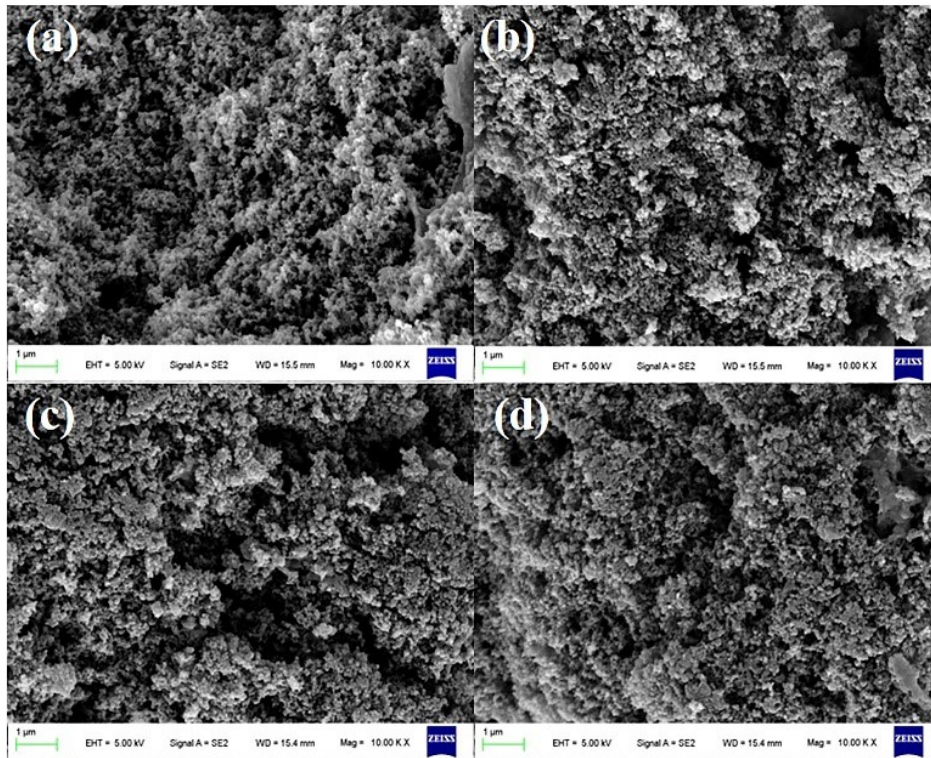

**Figure S20.** SEM images of  $P_2W_{18}Mn_4@PCN-222$  loaded carbon cloth electrode before and after the ECR test of 2 h (a,b) and 36 h (c,d).

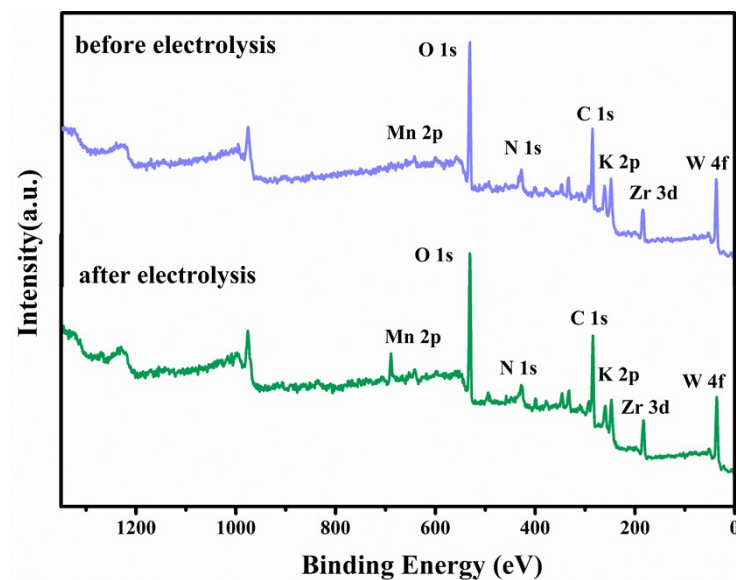

**Figure S21.** XPS spectra of  $P_2W_{18}Mn_4@PCN-222$  composite before and after electrolysis.



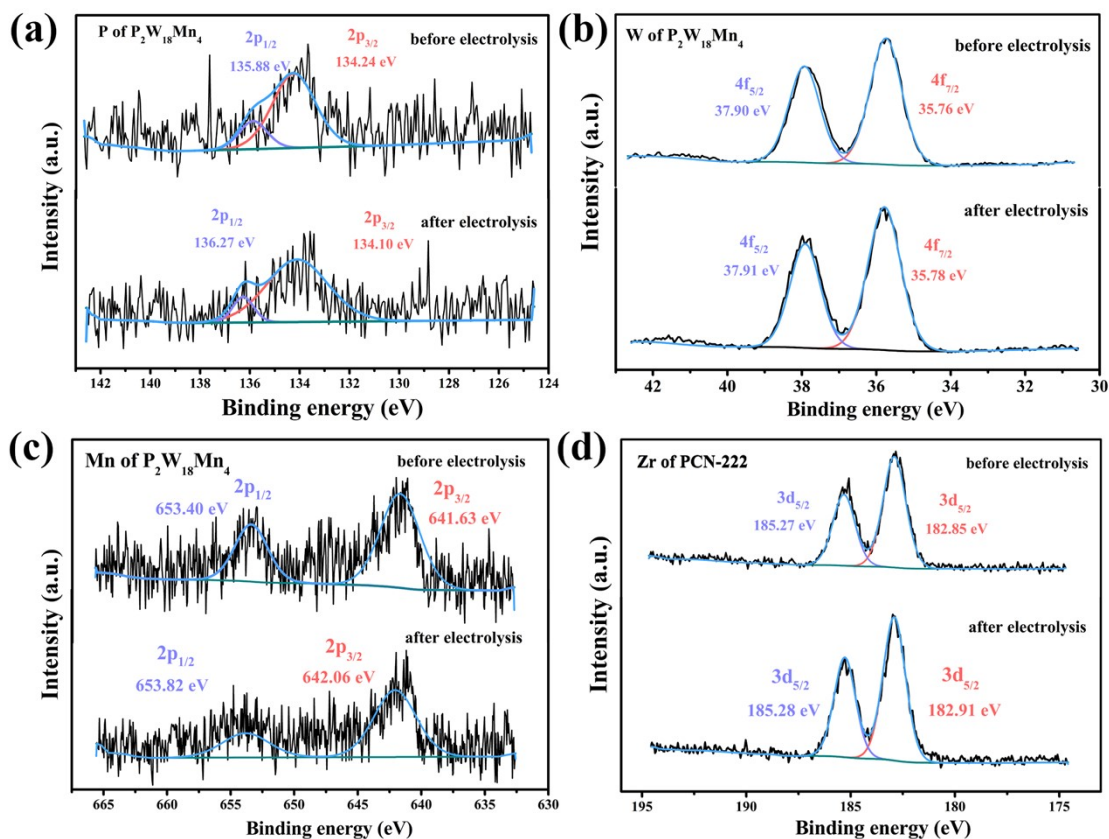

**Figure S22.** XPS spectra of  $P_2W_{18}Mn_4@PCN-222$  composite before and after electrolysis: (a) P 2p; (b) W 4f; (c) Mn 2p; (d) Zr 3d.

#### About the stability test:

When directly using the potassium salts of  $P_2W_{18}M_4$  as the electrocatalyst to mix with the Nafion ink, we can notice the exfoliation of the catalyst layer from the carbon cloth after 2 h electrolysis (Figure S19a,b), hinting at the instability of the  $P_2W_{18}M_4$  under this experimental condition. In contrast, the incorporation of  $P_2W_{18}M_4$  inside the framework of PCN-222 could provide super-stability, as shown in Figure S19c-d. After the electrocatalysis test, the solution has no color change. Since the electrode is made by mixing with the Nafion ink and loaded on the carbon cloth, all of the diffraction peaks of PCN-222 would be covered by the signal of C. Therefore, we could not obtain support from the XRD analysis. The same situation happens to the IR analysis. To support the stability of the electrode, we measured the ICP, XPS, and SEM before and after electrolysis. The SEM images for the  $P_2W_{18}Mn_4@PCN-222$  modified electrode have minor changes even over 36 h electrolysis, supporting the excellent stability of the composite (Figure S20). For the XPS spectra,

the binding energies of P, W, Mn, Zr signals have little change before and after electrolysis (Figure S21-S22).

For the ICP test, we used the sample which has been deposited on the carbon cloth. We scraped off the composite before and after electrolysis and then tested the metal content. We can conclude that the Nafion membrane and the PCN-222 framework could well protect against the leaching of polyanions. The content of P, W, Mn, and Zr has little change before and after electrolysis.

**Table S10.** ICP results for each composite before and after electrolysis

|                                                                                        | K     | P     | W     | Mn/Ni/Zn | Zr    |
|----------------------------------------------------------------------------------------|-------|-------|-------|----------|-------|
|                                                                                        | mg/L  |       |       |          |       |
| <b>P<sub>2</sub>W<sub>18</sub>Mn<sub>4</sub>@PCN-222<br/>(before electrolysis)</b>     | 0.030 | 0.045 | 2.385 | 0.157    | 1.684 |
| <b>P<sub>2</sub>W<sub>18</sub>Mn<sub>4</sub>@PCN-222<br/>(after electrolysis 36 h)</b> | 0.026 | 0.047 | 2.390 | 0.159    | 1.679 |
| <b>P<sub>2</sub>W<sub>18</sub>Ni<sub>4</sub>@PCN-222<br/>(before electrolysis)</b>     | 0.027 | 0.046 | 2.420 | 0.170    | 1.895 |
| <b>P<sub>2</sub>W<sub>18</sub>Ni<sub>4</sub>@PCN-222<br/>(after electrolysis 2 h)</b>  | 0.021 | 0.043 | 2.399 | 0.170    | 1.876 |
| <b>P<sub>2</sub>W<sub>18</sub>Zn<sub>4</sub>@PCN-222<br/>(before electrolysis)</b>     | 0.032 | 0.052 | 2.693 | 0.196    | 1.364 |
| <b>P<sub>2</sub>W<sub>18</sub>Zn<sub>4</sub>@PCN-222<br/>(after electrolysis 2 h)</b>  | 0.033 | 0.050 | 2.690 | 0.198    | 1.365 |

### **About the screening of the computation models:**

After several trials, we finally confirmed the current computational models, whereas the terminal oxygen tends to interact with the N–H in the porphyrin ring. The porphyrin molecules act as active centers in ECR, which has been proposed in many experiments and theoretical works.<sup>5,14–15,21</sup> Moreover, on the basis of the experimental study, the POMs alone have been confirmed inactive for ECR. The incorporated POM prefers to stay in the hexagonal channels of the PCN-222 and adjusts itself close to the porphyrin center.<sup>14,15</sup> In view of this, we adopted finite cluster calculations for saving computing tasks and proposed several possible interactions between H<sub>2</sub>–TCPP and P<sub>2</sub>W<sub>18</sub>M<sub>4</sub> (Figure S23), (a) M–OH<sub>2</sub>–N (strong interaction); (b) M–OH<sub>2</sub>···N (weak interaction); (c) W=O···N–H (weak interaction, W=O comes from the polar {W<sub>3</sub>O<sub>10</sub>} cluster); (d) W=O–N–H (strong interaction, W=O comes from the polar {W<sub>3</sub>O<sub>10</sub>} cluster); (e) W=O–N–H (strong interaction, W=O comes from the equatorial {W<sub>3</sub>O<sub>10</sub>} cluster). However, only the proposed interactions of d and e could be structurally optimized. Other configurations suffer from severe deformation. The optimized configurations of d and e were applied for further energy barrier calculation. The free energy diagrams indicate that the e configuration contradicts the experimental results. Therefore, the configuration of d is screened as a potential interaction for further investigation.

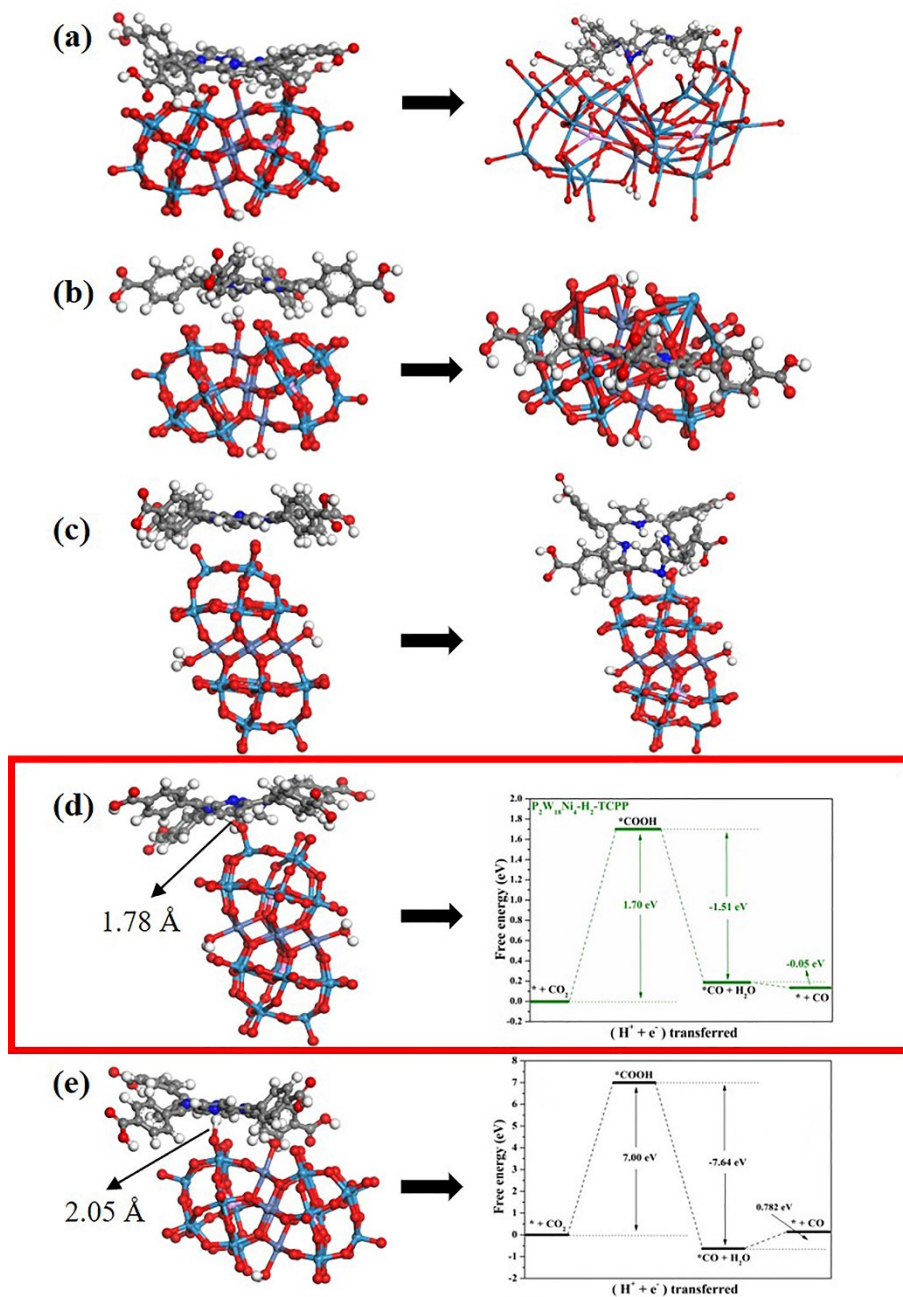

**Figure S23.** Five kinds of possible interactions between  $P_2W_{18}M_4$  and  $H_2$ -TCPP; (a)  $M-OH_2-N$  (strong interaction); (b)  $M-OH_2 \cdots N$  (weak interaction); (c)  $W=O \cdots N-H$  (weak interaction,  $W=O$  comes from the polar  $\{W_3O_{10}\}$  cluster); (d)  $W=O-N-H$  (strong interaction,  $W=O$  comes from the polar  $\{W_3O_{10}\}$  cluster); (e)  $W=O-N-H$  (strong interaction,  $W=O$  comes from the equatorial  $\{W_3O_{10}\}$  cluster).

## Reference

- 1 J. Y. Han, D. P. Wang, Y. H. Du, S. B. Xi, Z. Chen, S. M. Yin, T. H. Zhou and R. Xu, *Appl. Catal. A: Gen.*, 2016, **521**, 83–89.
- 2 S. Karamzadeh, E. Sanchooli, A. R. Oveisi, S. Daliran and R. Luque, *Appl. Catal. B.*, 2022, **303**, 120815.
- 3 H. Wu, S. H. Fan, W. Y. Zhu, Z. Dai, X. Y. Zou, *Bisens. Bioelectron.*, 2013, 589–594.
- 4 M. M. Conradie, J. Conradie, *Electrochim. Acta*, 2015, 512–519.
- 5 M. J. Liu, M. T. Peng, B. X. Dong, Y. L. Teng, L. G. Feng and Q. Xu, *Chin. J. Struct. Chem.*, 2022, **41**, 2207046–2207052.
- 6 M. García, M. J. Aguirre, G. Canzi, C. P. Kubiak, M. Ohlbaum and M. Isaacs, *Electrochim. Acta.*, 2014, **115**, 146–154.
- 7 S. X. Guo, D. R. MacFarlane and J. Zhang, *ChemSusChem.*, 2016, **9**, 80–87.
- 8 S. X. Guo, F. W. Li, L. Chen, D. R. MacFarlane and J. Zhang, *ACS Appl. Mater. Interfaces.*, 2018, **10**, 12690–12697.
- 9 Y. R. Wang, Q. Huang, C. T. He, Y. F. Chen, J. Liu, F. C. Shen and Y. Q. Lan, *Nat. Commun.*, 2018, **9**, 4466.
- 10 M. Girardi, D. Platzer, S. Griveau, F. Bedioui, S. Alves, A. Proust and S. Blanchard, *Eur. J. Inorg. Chem.*, 2019, 387–393.
- 11 J. Du, Z. L. Lang, Y. Y. Ma, H. Q. Tan, B. L. Liu, Y. H. Wang, Z. H. Kang and Y. G. Li, *Chem. Sci.*, 2020, **11**, 3007–3015.
- 12 D. J. Zang, Q. Li, G. Y. Dai, M. Y. Zeng, Y. C. Huang and Y. G. Wei, *Appl. Catal. B.*, 2021, **281**, 119426.
- 13 H. Z. Yang, D. R. Yang, Y. Zhou and X. Wang, *J. Am. Chem. Soc.*, 2021, **143**, 13721–13730.
- 14 M. L. Sun, Y. R. Wang, W. W. He, R. L. Zhong, Q. Z. Liu, S. Y. Xu, J. M. Xu, X. L. Han, X. Y. Ge, S. L. Li, Y. Q. Lan, A. M. Al-Enizi, A. Nafady and S. Q. Ma, *Small.*, 2021, **17**, 2100762.
- 15 Z. F. Xin, Y. R. Wang, Y. F. Chen, W. L. Li, L. Z. Dong and Y. Q. Lan, *Nano Energy.*, 2020, **67**, 104233–104241.
- 16 Q. Wu, R. K. Xie, M. J. Mao, G. L. Chai, J. D. Yi, S. S. Zhao, Y. B. Huang and R. Cao, *ACS Energy Lett.*, 2020, **5**, 1005–1012.
- 17 X. D. Zhang, S. Z. Hou, J. X. Wu and Z. Y. Gu, *Chem. Eur. J.*, 2020, **26**, 1604–1611.

- 18 E. X. Chen, J. Yang, M. Qiu, X. Y. Wang, Y. F. Zhang, Y. J. Guo, S. L. Huang, Y. Y. Sun, J. Zhang, Y. Hou and Q. P. Lin, *ACS Appl. Mater. Interfaces.*, 2020, **12**, 52588–52594.
- 19 C. B. Lu, J. Yang, S. C. Wei, S. Bi, Y. Xia, M. X. Chen, Y. Hou, M. Qiu, C. Yuan, Y. Z. Su, F. Zhang, H. W. Liang and X. D. Zhuang, *Adv. Funct. Mater.*, 2019, **29**, 1806884–1806891.
- 20 Z. F. Xin, J. J. Liu, X. J. Wang, K. J. Shen, Z. B. Yuan, Y. F. Chen and Y. Q. Lan, *ACS Appl. Mater. Interfaces.*, 2021, **13**, 54959–54966.
- 21 C. Wang, C. Y. Zhu, M. Zhang, Y. Geng, Y. G. Li and Z. M. Su, *J. Mater. Chem. A.*, 2020, **8**, 14807–14814.
